# Supplementary material
Source: MDPI journal article supplement (https://www.mdpi.com/2073-4441/15/16/2962)
Supplement: s1 [file s1]

# Porous asphalt mixture with improved fatigue resistance and stormwater pollutants reduction in urban road pavement

Gabriela Hammes <sup>1</sup>, Liseane Padilha Thives <sup>2,\*</sup>

<sup>1</sup> Federal University of Santa Catarina; gabrielahammes.ecv@gmail.com

<sup>2</sup> Federal University of Santa Catarina; liseane.thives@ufsc.br

\* Correspondence: liseane.thives@ufsc.br; Tel.: +55-48-37212114 (L.P.T.)

## Supplementary Data

### Figure

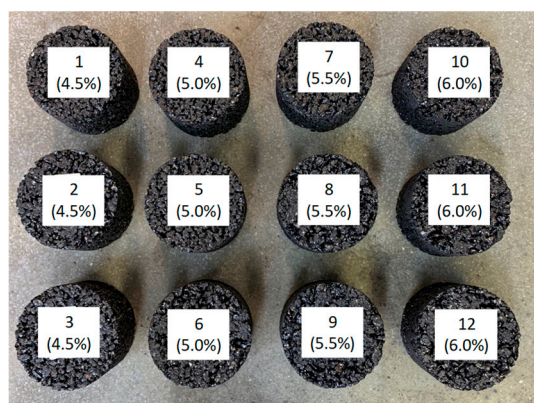

**Figure S1.** Compacted samples.

### Tables

**Table S1.** Crush aggregate (9.5 mm) characterization tests results.

| Properties              | Unit | Limit    | Result |
|-------------------------|------|----------|--------|
| Los Angeles abrasion    | %    | 30 (max) | 21.47  |
| Water absorption        | %    | -        | 0.47   |
| Flakiness index         | %    | 10 (max) | 9.0    |
| Durability <sup>1</sup> |      | 12 (max) | 2.8    |

<sup>1</sup> ASTM C88 [94].

**Table S2.** Water quality limits for non-potable purposes (Based on [68]).

| Parameters                    | Limit          |
|-------------------------------|----------------|
| pH                            | 6.0 – 9.0      |
| Faecal coliforms              | Non-detectable |
| Colour (HU <sup>1</sup> )     | ≤ 10           |
| Turbidity (TU <sup>2</sup> )  | ≤ 2            |
| Odour and appearance          | Not unpleasant |
| Chemical oxygen demand (mg/L) | ≤ 10           |
| Nitrate (mg/L)                | ≤ 10           |
| Ammoniacal nitrogen (mg/L)    | ≤ 20           |
| Nitrite (mg/L)                | ≤ 1            |
| Total Phosphorus (mg/L)       | ≤ 0.1          |
| Total Suspended Solids (mg/L) | ≤ 5            |

<sup>1</sup> Hazen Unit; <sup>2</sup> Turbidity Unit

**Table S3.** Measurements to evaluate the porous mixture infiltration efficiency.

| Rain event            | h <sub>s</sub> <sup>1</sup> (mm) | h <sub>1</sub> <sup>2</sup> (mm) | h <sub>2</sub> <sup>3</sup> (mm) | E <sub>1</sub> <sup>4</sup> (%) | E <sub>2</sub> <sup>5</sup> (%) |
|-----------------------|----------------------------------|----------------------------------|----------------------------------|---------------------------------|---------------------------------|
| 1                     | 23.0                             | 21.5                             | 21.0                             | 93.5                            | 91.3                            |
| 2                     | 32.5                             | 29.5                             | 28.9                             | 90.8                            | 88.9                            |
| 3                     | 11.5                             | 10.5                             | 10.0                             | 91.3                            | 87.0                            |
| 4                     | 14.5                             | 12.5                             | 13.0                             | 86.2                            | 89.7                            |
| 5                     | 6.0                              | 4.5                              | 5.0                              | 75.0                            | 83.3                            |
| 6                     | 15.0                             | 13.5                             | 12.9                             | 90.0                            | 86.0                            |
| 7                     | 9.0                              | 8.0                              | 8.5                              | 88.9                            | 94.4                            |
| 8                     | 14.5                             | 13.0                             | 13.5                             | 89.7                            | 93.1                            |
| 9                     | 18.5                             | 17.5                             | 17.3                             | 94.6                            | 93.5                            |
| 10                    | 15.0                             | 14.0                             | 13.6                             | 93.3                            | 90.7                            |
| 11                    | 20.0                             | 18.5                             | 18.4                             | 92.5                            | 92.0                            |
| 12                    | 13.5                             | 11.5                             | 11.2                             | 85.2                            | 83.0                            |
| 13                    | 10.5                             | 10.0                             | 9.8                              | 95.2                            | 93.3                            |
| 14                    | 20.5                             | 18.5                             | 19                               | 90.2                            | 92.7                            |
| 15                    | 17.5                             | 15.5                             | 14.7                             | 88.6                            | 84.0                            |
| 16                    | 8.5                              | 7.0                              | 7.3                              | 82.4                            | 85.9                            |
| 17                    | 18.0                             | 17.0                             | 17.6                             | 94.4                            | 97.8                            |
| 18                    | 28.0                             | 27.0                             | 27.1                             | 96.4                            | 96.8                            |
| <b>Mean</b>           | -                                | <b>15.0</b>                      | <b>14.9</b>                      | <b>89.9</b>                     | <b>90.2</b>                     |
| <b>SD<sup>6</sup></b> | -                                | <b>6.5</b>                       | <b>6.4</b>                       | <b>5.2</b>                      | <b>4.5</b>                      |

<sup>1</sup> Height of rainwater stored in the empty box; <sup>2</sup> Height of rainwater infiltrated through the slab 1; <sup>3</sup> Height of rainwater infiltrated through the slab 2; <sup>4</sup> Infiltration capacity of the slab 1; <sup>5</sup> Infiltration capacity of the slab 2 <sup>6</sup> Standard Deviation.

**Table S4.** Water quality evaluation collected from stormwater runoff (road) and filtered through the porous mixture slab.

| Sample                | Runoff       | Slab         | Difference   |
|-----------------------|--------------|--------------|--------------|
| <i>pH</i>             |              |              |              |
| 1                     | 7.00         | 6.80         | 2.9%         |
| 2                     | 7.50         | 7.31         | 2.6%         |
| 3                     | 7.36         | 7.15         | 2.9%         |
| 4                     | 7.34         | 7.22         | 1.7%         |
| <b>Mean</b>           | <b>7.30</b>  | <b>7.12</b>  | <b>2.5%</b>  |
| <b>SD</b>             | <b>0.21</b>  | <b>0.22</b>  | <b>0.6%</b>  |
| <i>Colour (HU)</i>    |              |              |              |
| 1                     | 110          | 94           | 17.0%        |
| 2                     | 208          | 209          | -0.5%        |
| 3                     | 209          | 182          | 14.8%        |
| 4                     | 95           | 109          | -12.8%       |
| <b>Mean</b>           | <b>155.5</b> | <b>148.5</b> | <b>4.6%</b>  |
| <b>SD</b>             | <b>61.5</b>  | <b>55.7</b>  | <b>14.0%</b> |
| <i>Turbidity (TU)</i> |              |              |              |
| 1                     | 33.2         | 24.2         | 37.2%        |
| 2                     | 61.1         | 25.4         | 140.6%       |
| 3                     | 55.0         | 36.6         | 50.3%        |
| 4                     | 21.8         | 18.3         | 19.1%        |
| <b>Mean</b>           | <b>42.78</b> | <b>26.13</b> | <b>61.8%</b> |
| <b>SD</b>             | <b>18.4</b>  | <b>7.6</b>   | <b>54.0%</b> |

Table S.4 continued

| <i>Chemical oxygen demand (mg/L)</i> |                 |               |                |
|--------------------------------------|-----------------|---------------|----------------|
| 1                                    | 8.8             | 6.1           | 44.3%          |
| 2                                    | 11.0            | 11.0          | 0.0%           |
| 3                                    | 7.7             | 6.3           | 22.2%          |
| 4                                    | 6.6             | 7.8           | -15.4%         |
| <b>Mean</b>                          | <b>8.53</b>     | <b>7.80</b>   | <b>12.8%</b>   |
| <b>SD</b>                            | <b>1.88</b>     | <b>2.26</b>   | <b>26.1%</b>   |
| <i>Nitrate (mg/L)</i>                |                 |               |                |
| 1                                    | 0.45            | 0.63          | -28.6%         |
| 2                                    | 0.10            | 0.51          | -80.4%         |
| 3                                    | 0.22            | 0.01          | -*             |
| 4                                    | 0.50            | 0.34          | 47.1%          |
| <b>Mean</b>                          | <b>0.32</b>     | <b>0.37</b>   | <b>-20.6%</b>  |
| <b>SD</b>                            | <b>0.19</b>     | <b>0.27</b>   | <b>36.6%</b>   |
| <i>Ammoniacal nitrogen (mg/L)</i>    |                 |               |                |
| 1                                    | 0.84            | 1.31          | -35.9%         |
| 2                                    | 1.31            | 1.11          | 18.0%          |
| 3                                    | 0.66            | 0.81          | -18.5%         |
| 4                                    | 0.28            | 0.63          | -55.6%         |
| <b>Mean</b>                          | <b>0.77</b>     | <b>0.97</b>   | <b>-23.0%</b>  |
| <b>SD</b>                            | <b>0.43</b>     | <b>0.30</b>   | <b>31.2%</b>   |
| <i>Nitrite (mg/L)</i>                |                 |               |                |
| 1                                    | 0.06            | 0.09          | -33.3%         |
| 2                                    | 0.06            | 0.06          | 0.0%           |
| 3                                    | 0.05            | 0.04          | 25.0%          |
| 4                                    | 0.02            | 0.03          | -33.3%         |
| <b>Mean</b>                          | <b>0.05</b>     | <b>0.06</b>   | <b>-10.4%</b>  |
| <b>SD</b>                            | <b>0.02</b>     | <b>0.03</b>   | <b>28.4%</b>   |
| <i>Total Phosphorus (mg/L)</i>       |                 |               |                |
| 1                                    | 1.23            | 0.31          | 296.8%         |
| 2                                    | 0.06            | 0             | -*             |
| 3                                    | 0               | 0             | -*             |
| 4                                    | 0.37            | 0.06          | 516.7%         |
| <b>Mean</b>                          | <b>0.42</b>     | <b>0.09</b>   | <b>406.7%</b>  |
| <b>SD</b>                            | <b>0.57</b>     | <b>0.15</b>   | <b>155.5%</b>  |
| <i>Total Suspended Solids (mg/L)</i> |                 |               |                |
| 1                                    | 180             | 36            | 400.0%         |
| 2                                    | 104             | 4             | 2500.0%        |
| 3                                    | 36              | 12            | 200.0%         |
| 4                                    | 72              | 8             | 800.0%         |
| <b>Mean</b>                          | <b>98.00</b>    | <b>15.00</b>  | <b>975.0%</b>  |
| <b>SD</b>                            | <b>61.32</b>    | <b>14.38</b>  | <b>1046.8%</b> |
| <i>Faecal coliforms</i>              |                 |               |                |
| 1                                    | 461.1           | 365.4         | 26.2%          |
| 2                                    | 2,419.2         | 435.2         | 541.9%         |
| 3                                    | 1,413.6         | 376.9         | 224.8%         |
| 4                                    | 770.1           | 658.3         | 17.0%          |
| <b>Mean</b>                          | <b>1,266.00</b> | <b>458.95</b> | <b>202.5%</b>  |
| <b>SD</b>                            | <b>865.15</b>   | <b>136.37</b> | <b>245.7%</b>  |

\*not considered.

**Table S5.** Soil (subgrade layer) characteristics [75].

| Parameters                               | Data   |
|------------------------------------------|--------|
| Poisson coefficient                      | 0.45   |
| Specific mass (g/cm <sup>3</sup> )       | 1.629  |
| <i>Resilient parameters</i> <sup>1</sup> |        |
| k <sub>1</sub>                           | 739.20 |
| k <sub>2</sub>                           | 0.34   |
| k <sub>3</sub>                           | 0.004  |

<sup>1</sup> Resilient modulus calculated according Equation S1.

*Equation*

$$RM = k_1 \times \sigma_3^{k_2} \times \sigma_d^{k_3} \quad (S1)$$

Where RM is the resilient modulus (MPa);  $\sigma_3$  is the principal stress (MPa),  $\sigma_d$  is the deviator stress (MPa); k<sub>1</sub>, k<sub>2</sub> and k<sub>3</sub> are the experimental coefficients.
